# Supplementary material
Source: publisher figshare collection journal article supplement (https://acs.figshare.com/ndownloader/files/19213148)
Supplement: Supplementary file 1 [file 19213148]

## Supporting Information

### In Situ Detection of Melatonin and Pyridoxine in Plants Using a CuO-Poly(L-lysine)/Graphene-Based Electrochemical Sensor

Yi Liu,<sup>†</sup> Mingji Li,<sup>\*,†</sup> Hongji Li,<sup>\*,‡</sup> Guilian Wang,<sup>§</sup> Yongbing Long,<sup>‡</sup> Aixue Li,<sup>‡</sup> and Baohe Yang<sup>†</sup>

<sup>†</sup>Tianjin Key Laboratory of Film Electronic and Communication Devices, School of Electrical and Electronic Engineering, Tianjin University of Technology, Tianjin 300384, P. R. China

<sup>‡</sup>Tianjin Key Laboratory of Organic Solar Cells and Photochemical Conversion, School of Chemistry and Chemical Engineering, Tianjin University of Technology, Tianjin 300384, P. R. China

<sup>§</sup>Tianjin Key Laboratory for Advanced Mechatronic System Design and Intelligent Control, Tianjin University of Technology, Tianjin 300384, China

<sup>‡</sup>College of Electronic Engineering, South China Agricultural University, Guangzhou 510642, P. R. China.

<sup>‡</sup>Beijing Research Center for Information Technology in Agriculture, Beijing Academy of Agriculture and Forestry Sciences, Beijing 100097, P. R. China.

#### Corresponding Authors

\* E-mails: limingji@163.com (M. Li); hongjili@yeah.net (H. Li).

| Page Nos. | Schemes | Figures | Tables |
|-----------|---------|---------|--------|
| 20        | 1       | 20      | 3      |

## ■ S1. EXPERIMENTAL SECTION

**Materials and chemicals.** Melatonin (MT), pyridoxine hydrochloride (PN, 99%,  $C_8H_{11}NO_3 \cdot HCl$ ), dopamine (DA), and  $Ni(NO_3)_2 \cdot 6H_2O$  were purchased from Alfa Aesar (USA).  $Na_2HPO_4$ ,  $NaH_2PO_4$ , L-lysine, L-cysteine, ascorbic acid, L-tyrosine, L-tryptophan, serine, KCl, and  $ZnCl_2$  were purchased from the Tianjin Guangfu Fine Chemical Research Institute (China). Absciscic acid and indole-3-acetic acid were purchased from Macklin (China). Glucose was purchased from the Shanghai Yuanye Biotechnology Co., Ltd. (China).  $CaCl_2$ ,  $CuSO_4 \cdot 5H_2O$ ,  $H_3PO_4$  and salicylic acid were purchased from the Tianjin Jiangtian Unified Technology Co., Ltd. (China).  $K_2SO_4$ ,  $Mg(NO_3)_2 \cdot 6H_2O$ ,  $Na_2S \cdot 9H_2O$ , hexacyanoferrate(II) trihydrate ( $K_4[Fe(CN)_6] \cdot 3H_2O$ ),  $K_3[Fe(CN)_6]$ , and  $NaNO_2$  were purchased from the Tianjin Kewei Co., Ltd. (China). NaCl,  $H_3BO_3$ , NaOH, and  $NH_4F$  were purchased from the Tianjin Fengchuan Chemical Reagent Technology Co., Ltd. (China). Phosphate-buffered saline (PBS) (pH 5–8) was prepared from 0.1 M  $NaH_2PO_4$  and 0.1 M  $Na_2HPO_4$ . Ultrapure water was used throughout.

## ■ S2. EXPERIMENTAL RESULTS

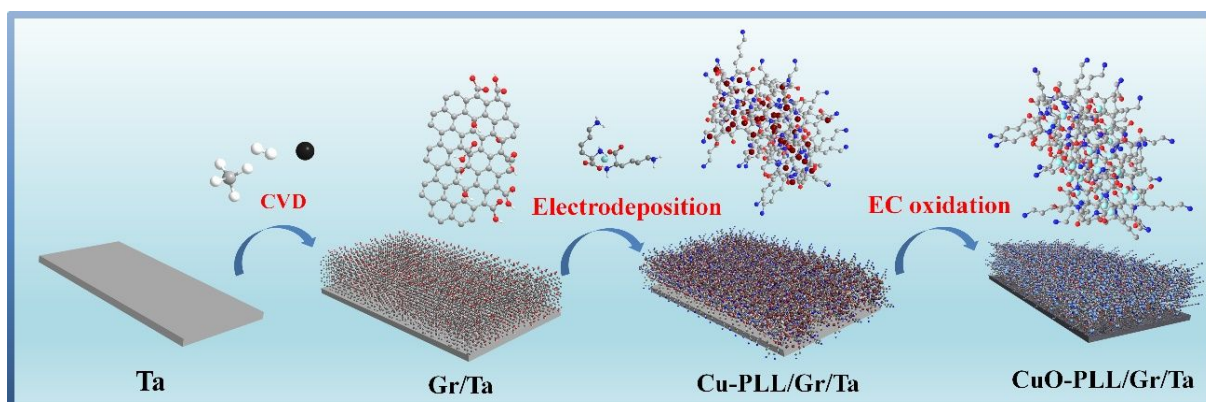

**Scheme S1.** Schematic diagram of the CuO-PLL/Gr-electrode fabrication process.

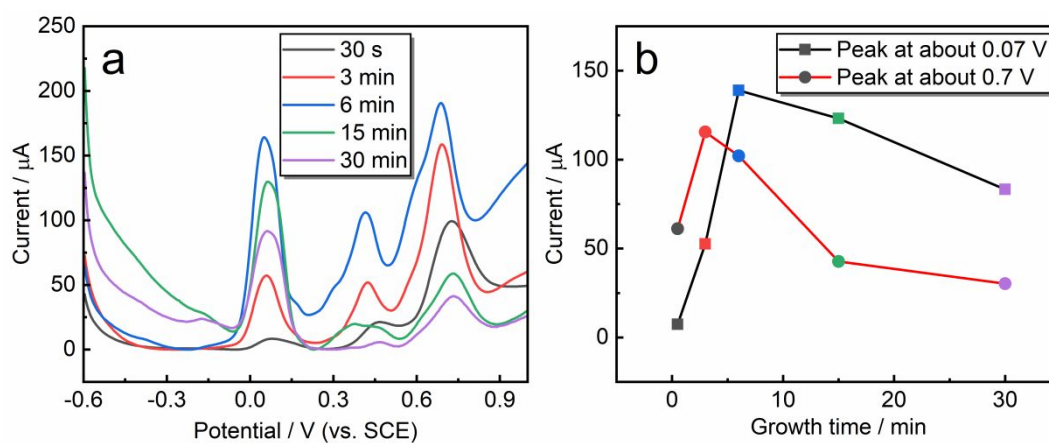

**Figure S1.** (a) DPV curves of the Gr/Ta sheet with different growth times in PBS (pH 6.0) containing 100  $\mu\text{M}$  MT and 1000  $\mu\text{M}$  PN. (b) Plot of the growth time as a function of the current.

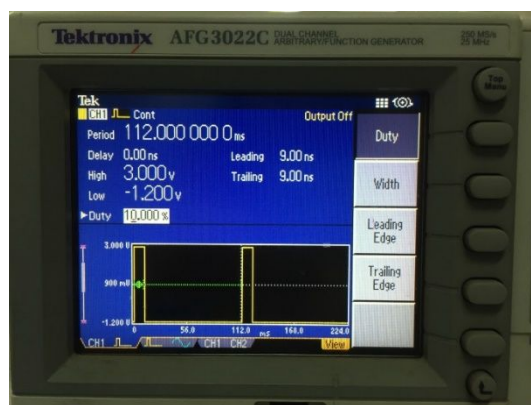

**Figure S2.** Showing the parameter interface of the signal generator for Cu-PLL electrodeposition.

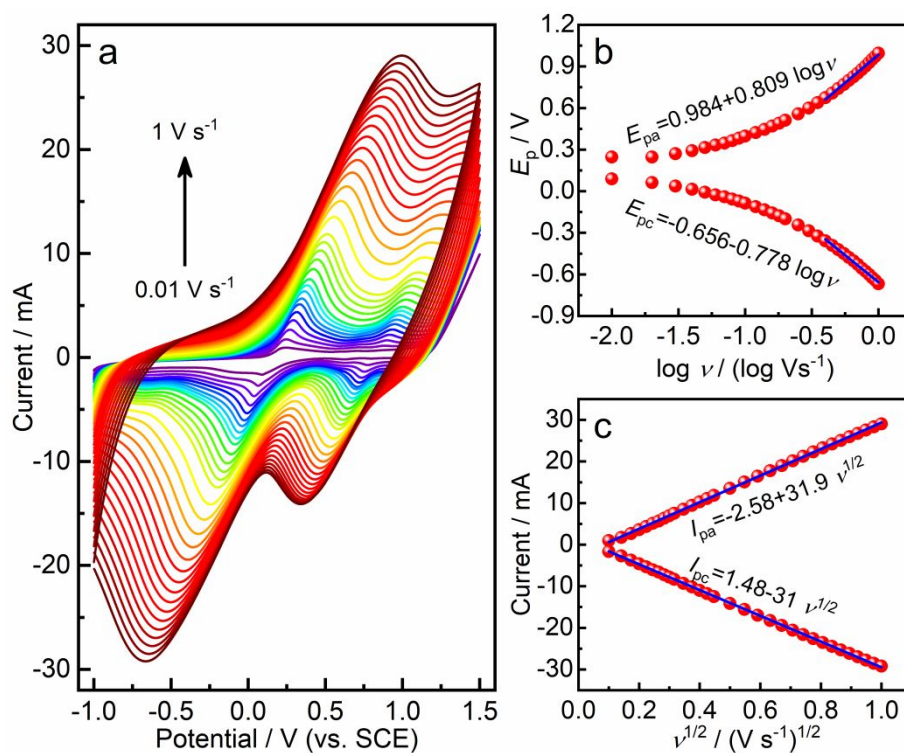

**Figure S3.** (a) CV curves of the CuO-PLL/Gr electrode in a mixed solution of 0.1 M KCl, 5 mM  $K_4[Fe(CN)_6]$ , and 5 mM  $K_3[Fe(CN)_6]$ . (b) Peak potentials ( $E_p$ ) as functions of the scan rate ( $\log \nu$ ). (c) Peak currents ( $I_p$ ) as functions of the square root of the scan rate ( $\nu^{1/2}$ ).

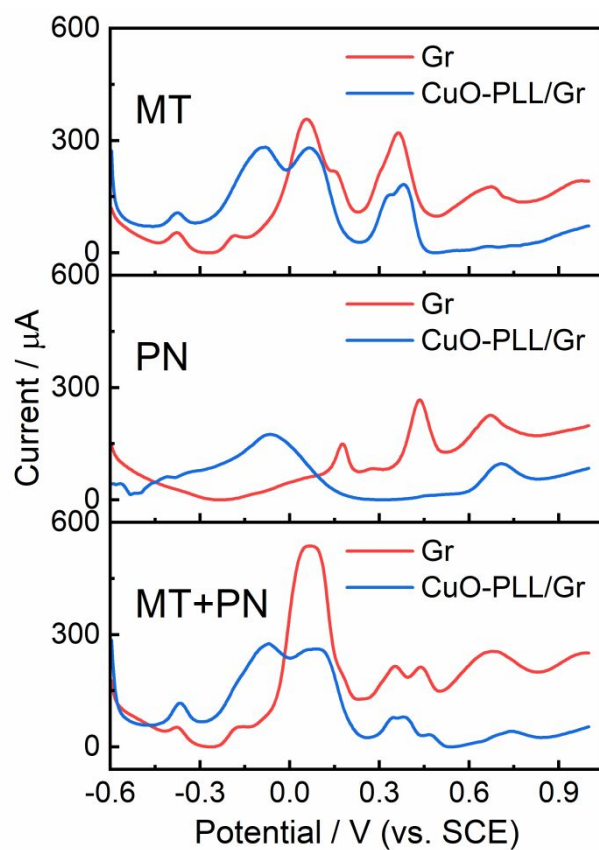

**Figure S4.** DPV traces recorded using Gr and CuO-PLL/Gr electrodes in 300  $\mu\text{M}$  MT, 800  $\mu\text{M}$  PN, and a mixed solution of MT and PN.

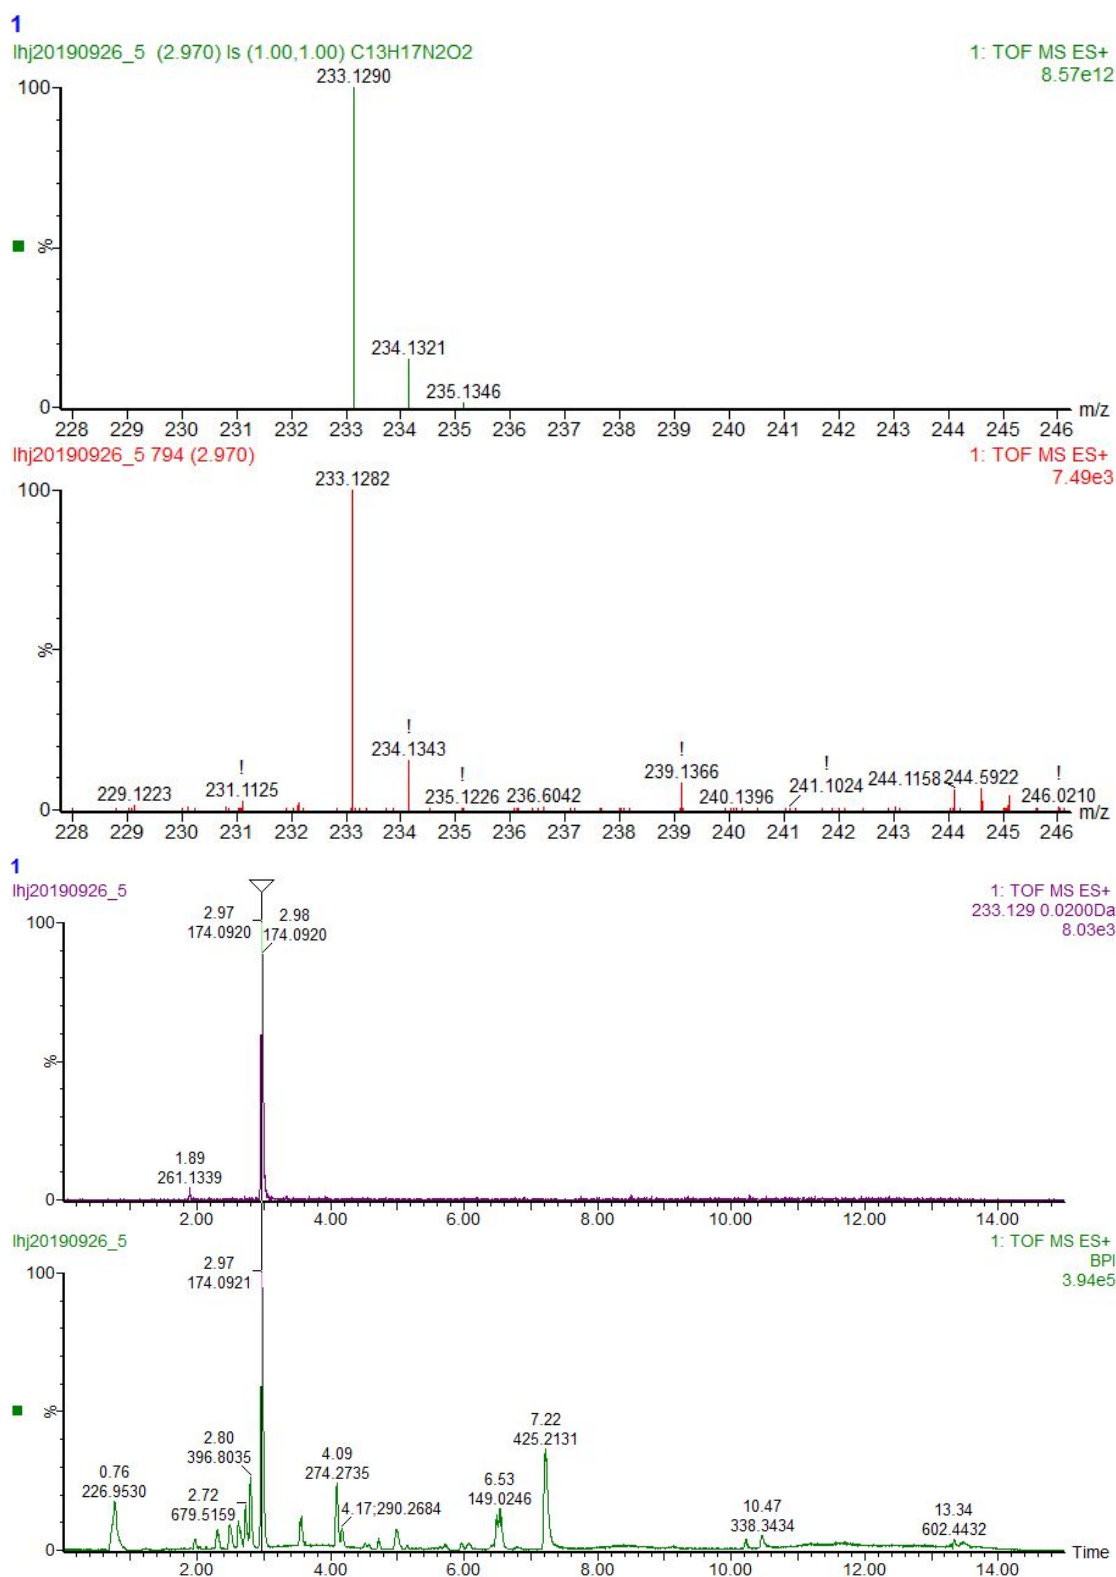

**Figure S5.** LC-MS spectra of MT solutions before test (MT:  $m/z = 233$ , ES<sup>+</sup>).

2

lhj20190926\_6 (2.379) Is (1.00,1.00) C<sub>13</sub>H<sub>15</sub>N<sub>2</sub>O<sub>2</sub>1: TOF MS ES+  
8.58e12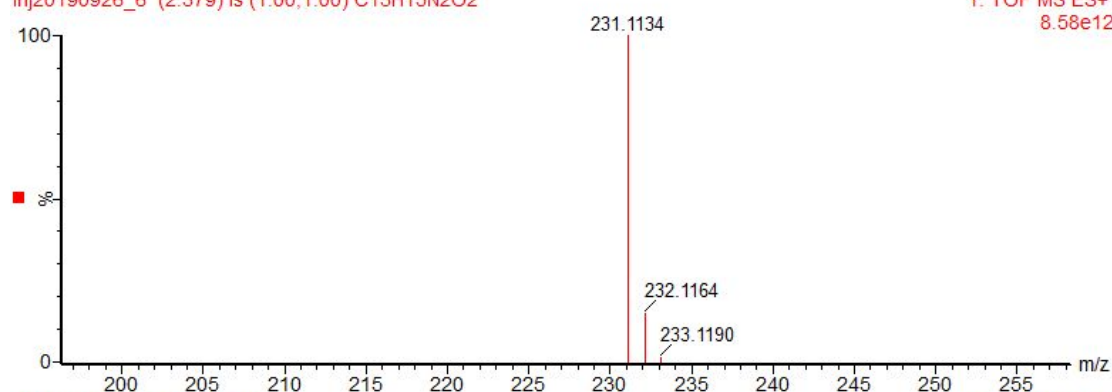

lhj20190926\_6 634 (2.379)

1: TOF MS ES+  
287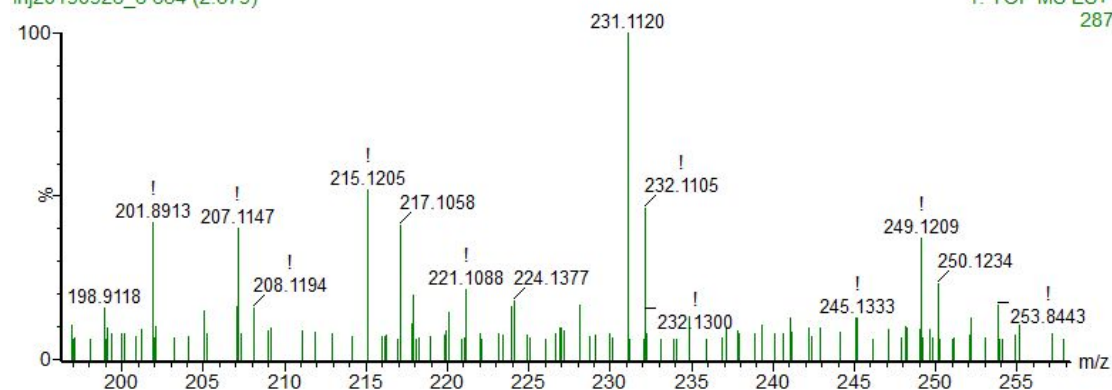

2

lhj20190926\_6

1: TOF MS ES+  
231.11  
2.28e3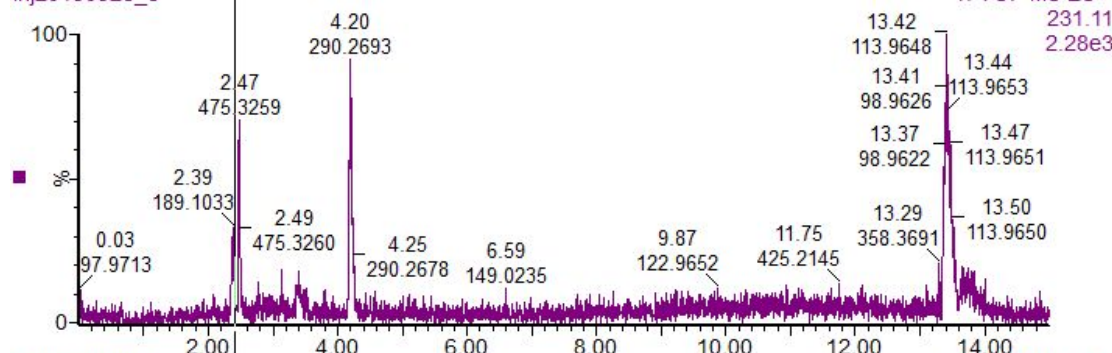

lhj20190926\_6

1: TOF MS ES+  
BPI  
3.43e5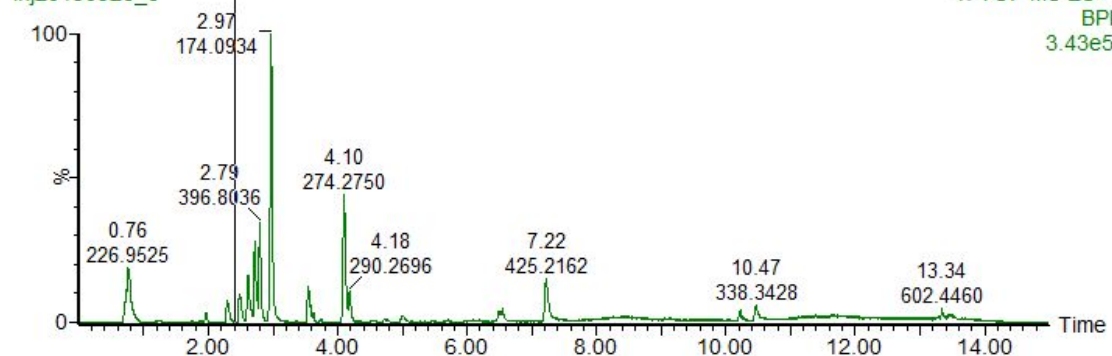

**Figure S6.** LC-MS spectra of MT solutions after the test (oxidized MT : m/z = 231, ES<sup>+</sup>).



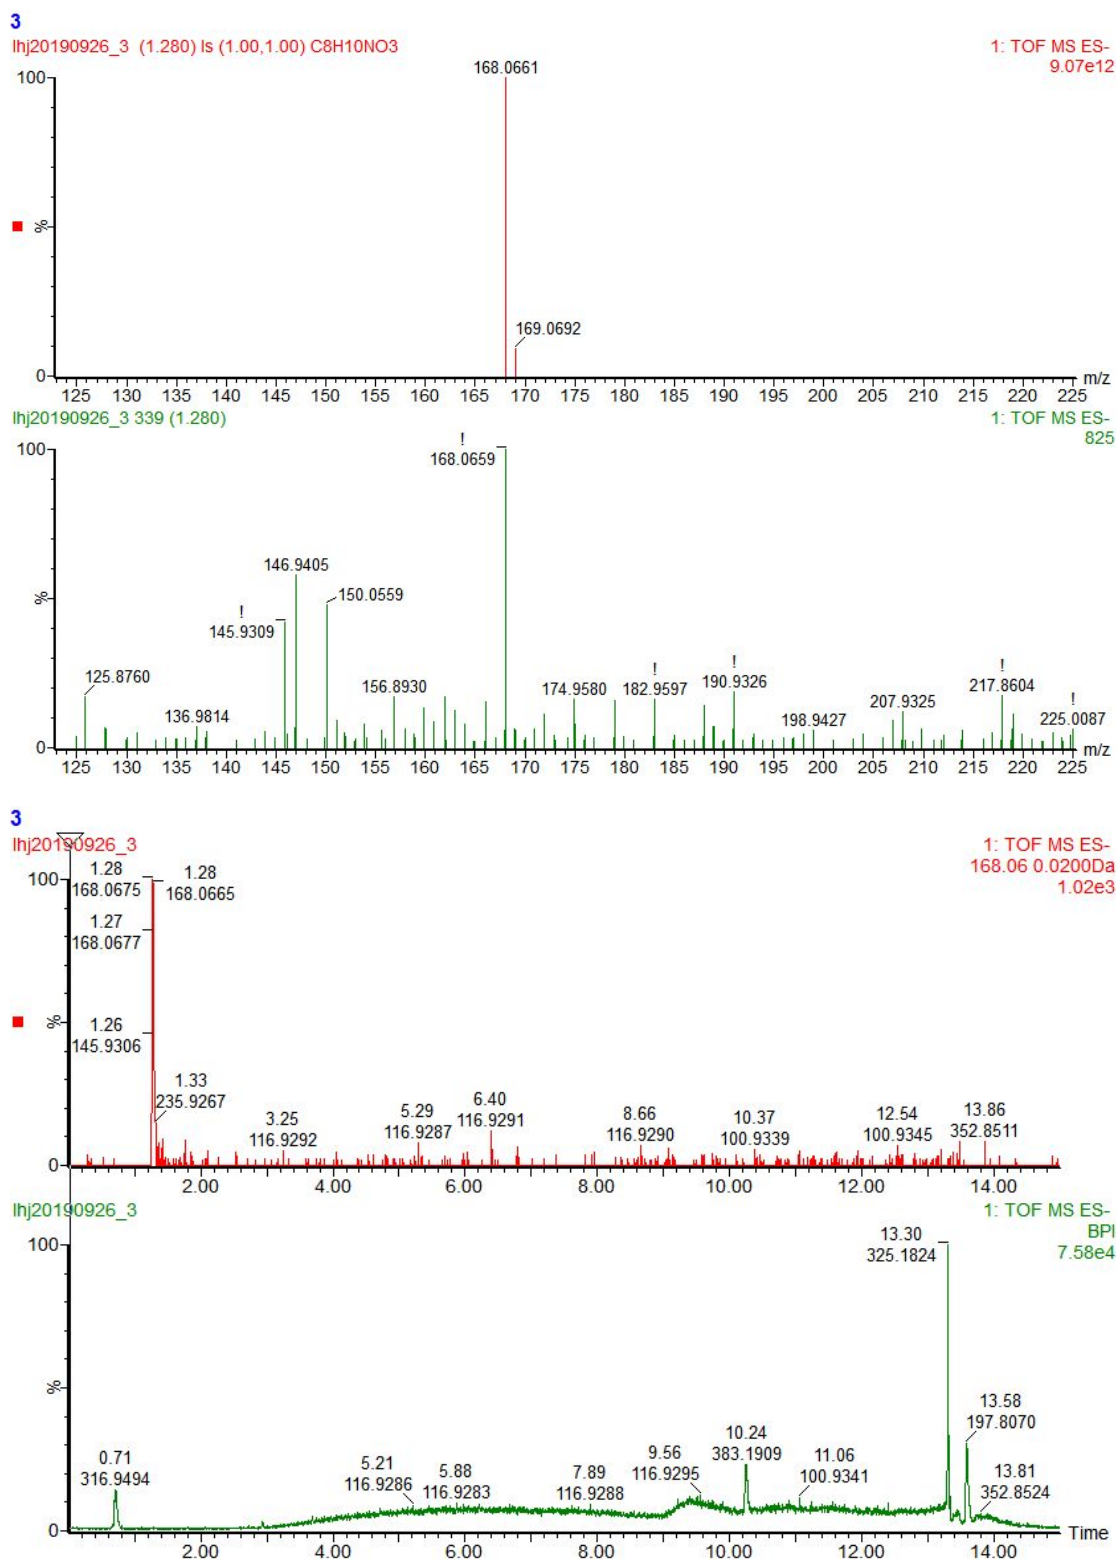

**Figure S7.** LC-MS spectra of PN solutions before the test (PN:  $m/z = 168$ , ES<sup>-</sup>).



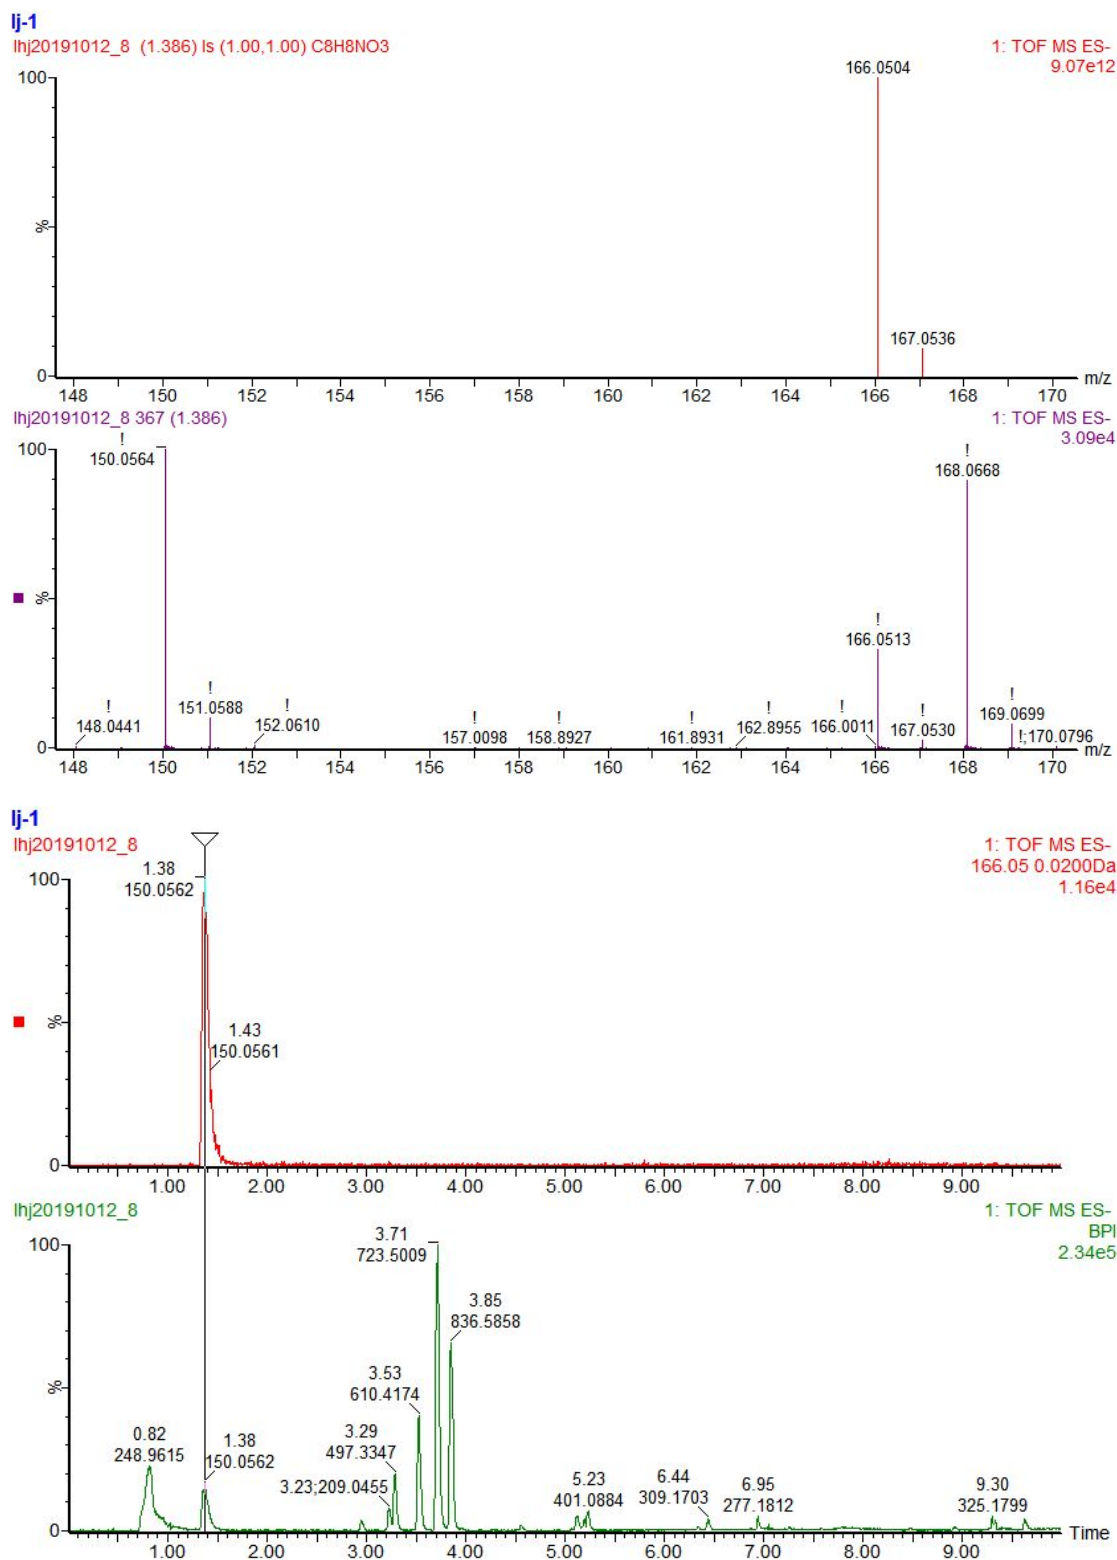

**Figure S8.** LC-MS spectra of PN solutions after the test (pyridoxal:  $m/z = 166$ , ES<sup>-</sup>).

To explore the reaction mechanism, we analyzed the reaction products of MT and PN by LC-MS. In the LC profile, MT and PN showed retention time at 2.97 and 1.28 min, respectively (Figures R15, and R17). In the MT solution after the DPV test, a new peak at 2.379 min appeared on the LC spectrum, and a predominant peak at  $m/z = 231.2461(\text{ES}^+)$  was observed from the HR-MS spectrum of the solution (Figure R17). We detected an oxidation product (deprotonated MT) with a molecular weight of 230 in the MT solution after the test. Similarly, a reaction product with a molecular weight of 167 was detected in the tested PN solution (Figure R18). The PN was oxidized to pyridoxal with a molecular weight of 167.18 ( $m/z = 166.05, \text{ES}^-$ ). The measured values are in agreement with the standard values. MS measurement confirmed the molecular weights of the reaction products. Based on the LC-MS results, the redox reactions could be proposed as shown in **Scheme 1c**.

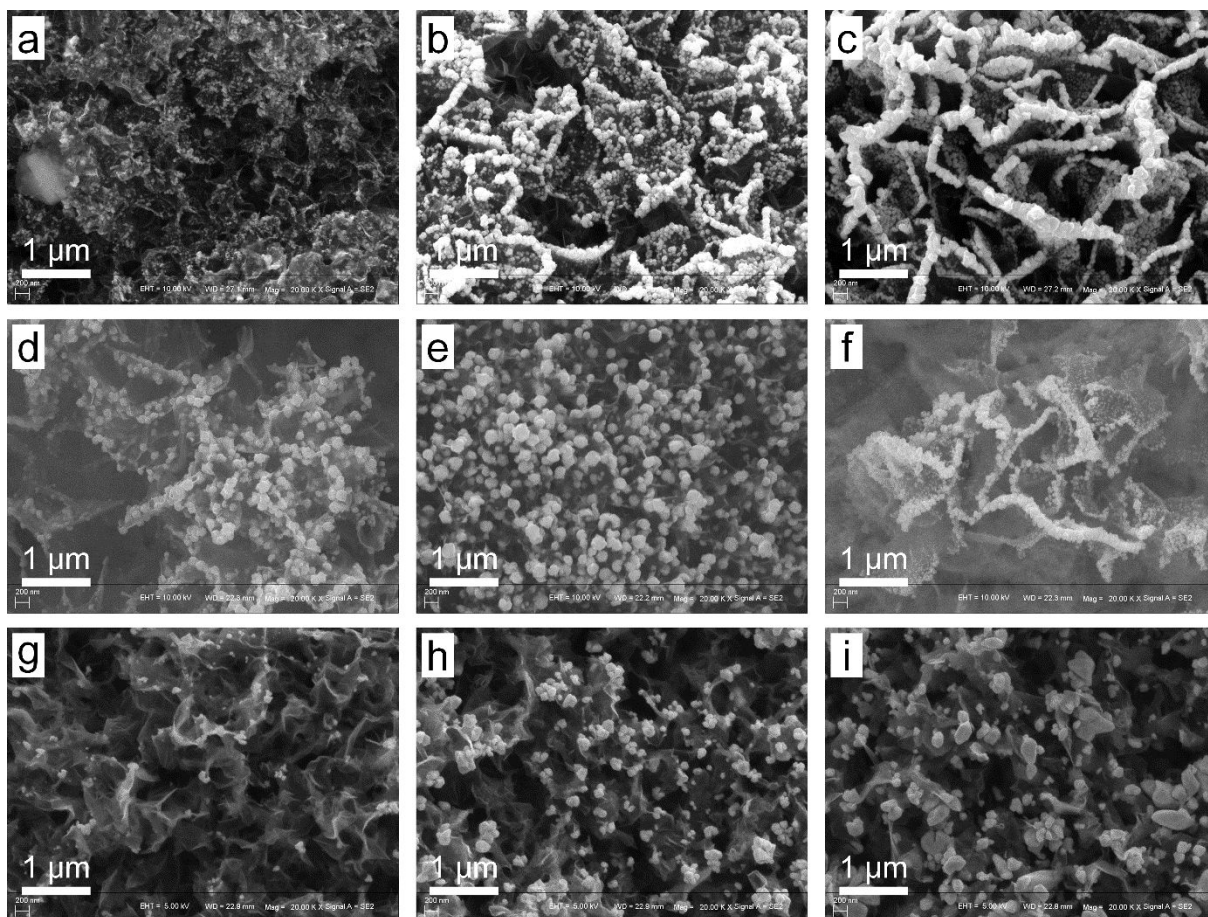

**Figure S9.** SEM images of various CuO-PLL/Gr electrodes: (a-c) With  $\text{Cu}^{2+}$  at concentrations of 0.4, 0.8, and 4 mM, respectively; (d-f) With voltage ranges for deposition of Cu-PLL of  $-1.2-0$ ,  $-1.2-1$ , and  $-3-0$  V, respectively; and (g-i) With various deposition times: 2, 6, and 30 min, respectively. Note: (a-f) pH 6, (d-i) 0.16 mM  $\text{Cu}^{2+}$ , and (g-i) pH 4. Other parameters are those of the optimized conditions.

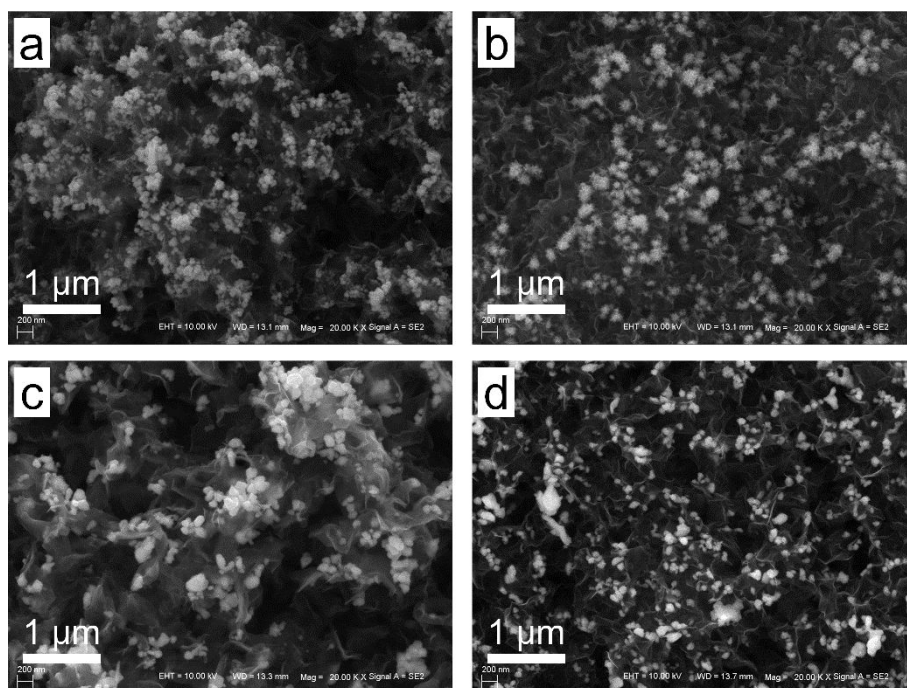

**Figure S10.** SEM images of CuO-PLL/Gr electrodes with CuO-PLL layers deposited on them at different potential ranges (magnified 20, 000 times). (a)  $-1.2-0$ , (b)  $-1.2-1$ , (c)  $-1.2-2$ , and (d)  $-1.2-3$  V. The electrolyte is a mixed solution of 1 mM  $L$ -lysine, 0.16 mM  $\text{CuSO}_4$ , 0.8 mM  $\text{NaCl}$ , 0.072 mM  $\text{H}_3\text{BO}_3$ , and 0.1 M PBS (pH 4.0).

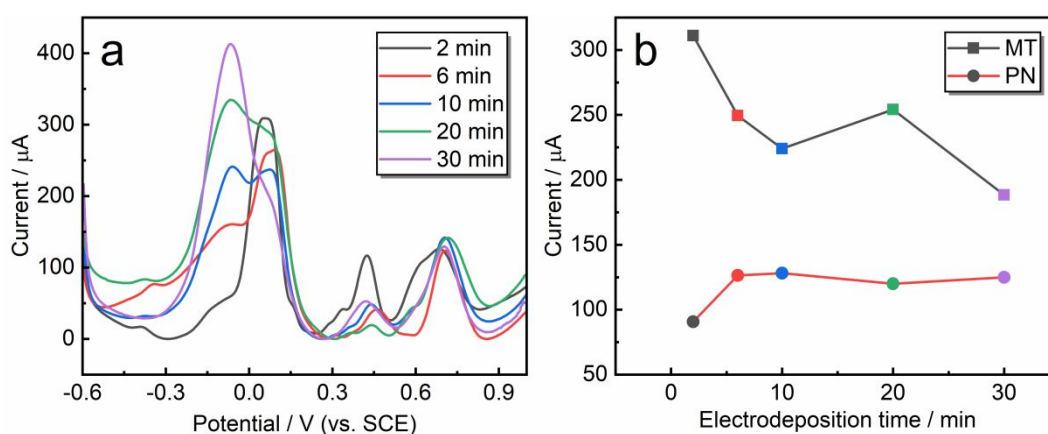

**Figure S11.** (a) DPV curves of the CuO-PLL/Gr electrodes with various deposition times for CuO-PLL. (b) Relationship between current and deposition time. The electrolyte solution was a mixture of 100  $\mu\text{M}$  MT and 1000  $\mu\text{M}$  PN.

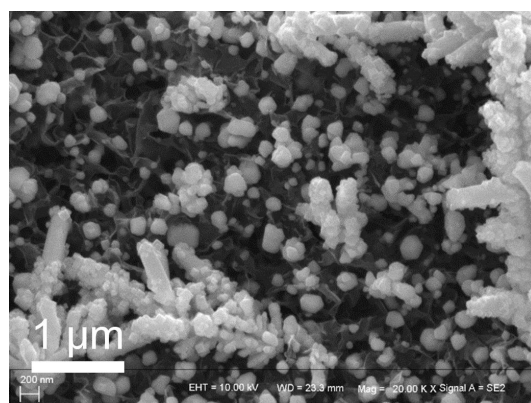

**Figure S12.** SEM image of the Cu/Gr electrode.

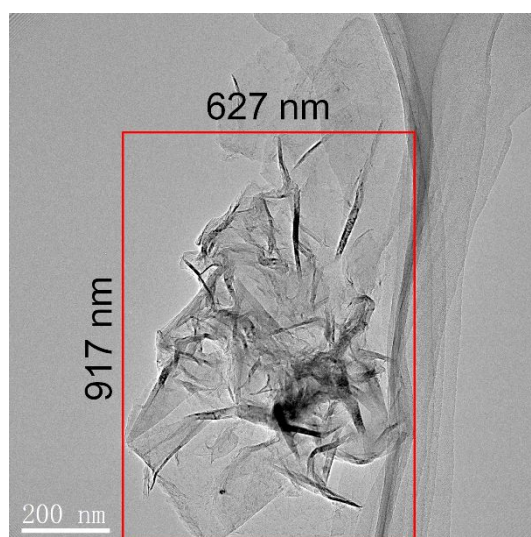

**Figure S13.** TEM image of a curled Gr sheet.



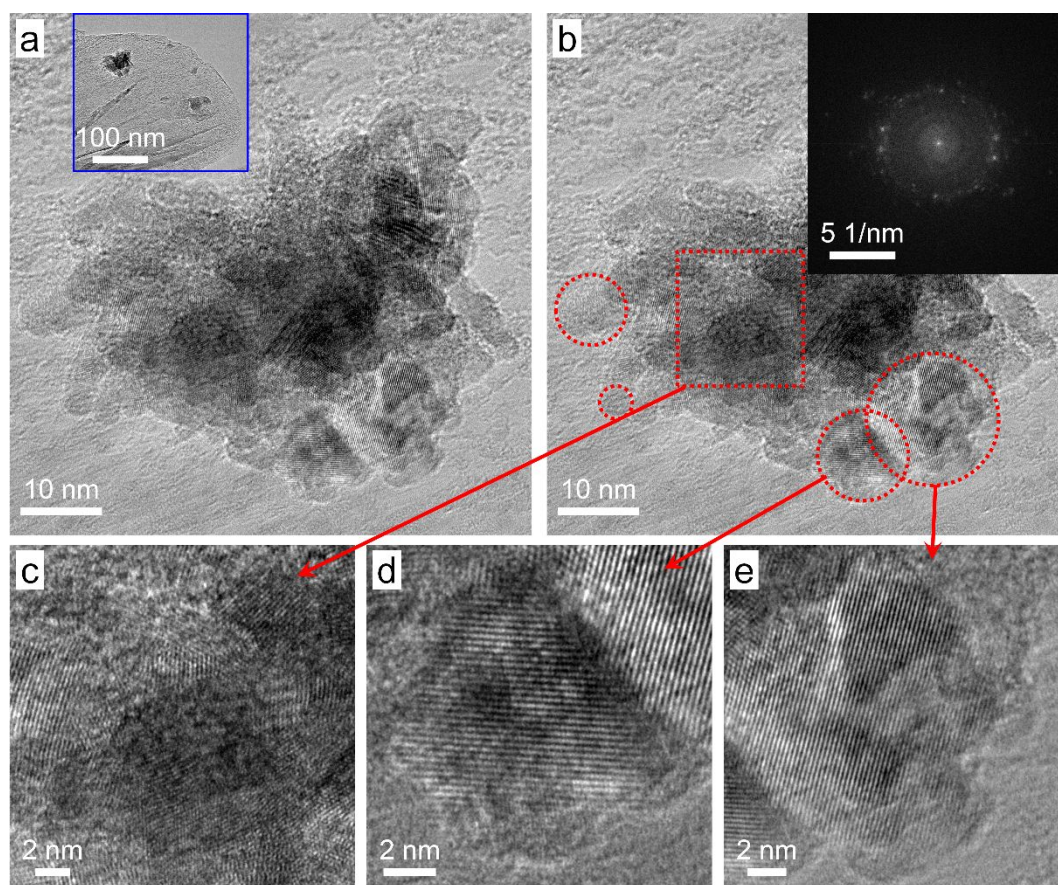

**Figure S14.** TEM and HRTEM images of the CuO-PLL/Gr nanosheets.

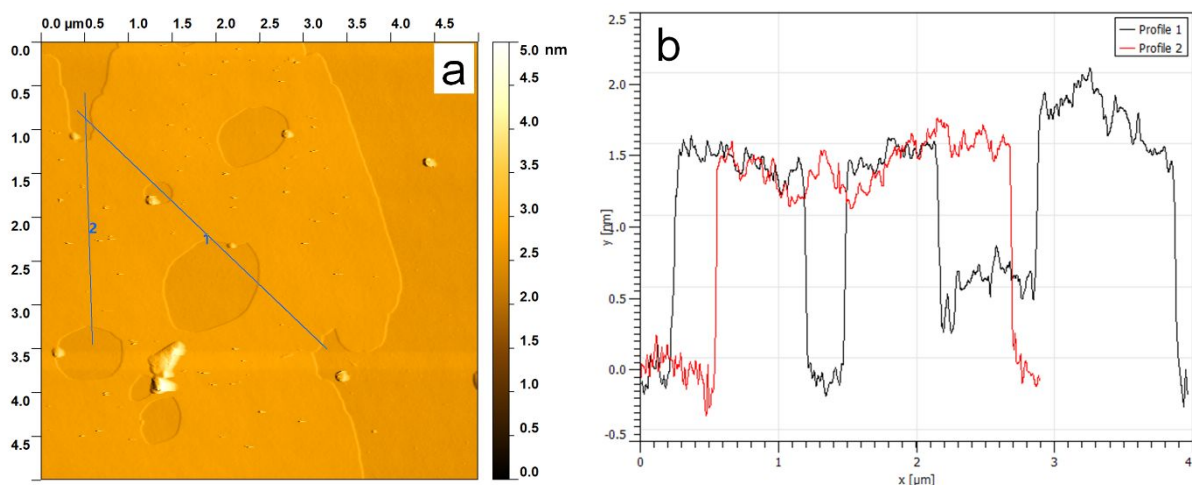

**Figure S15.** (a) AFM image of graphene sheets and (b) height profile along line.

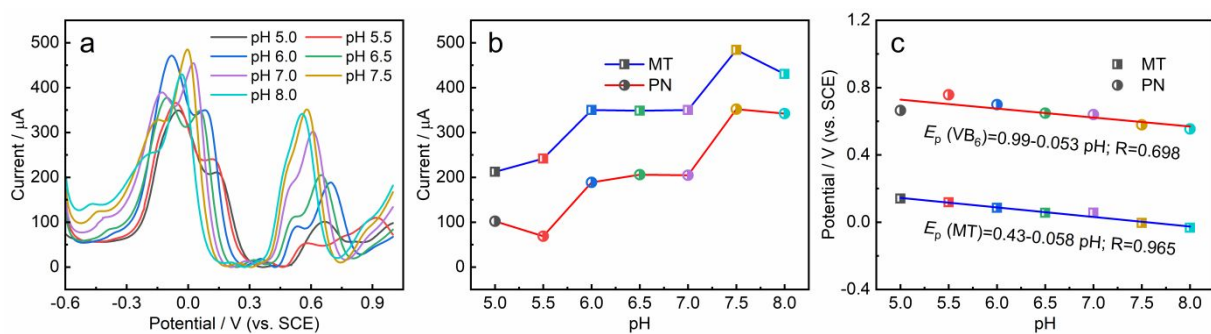

**Figure S16.** The effect of pH on the signal response of the CuO-PLL/Gr electrode. (a) DPV curves in pH 5–8 PBS containing 500  $\mu\text{M}$  MT and 800  $\mu\text{M}$  PN. (b) Peak currents as functions of pH. (c) Peak potentials as functions of pH.



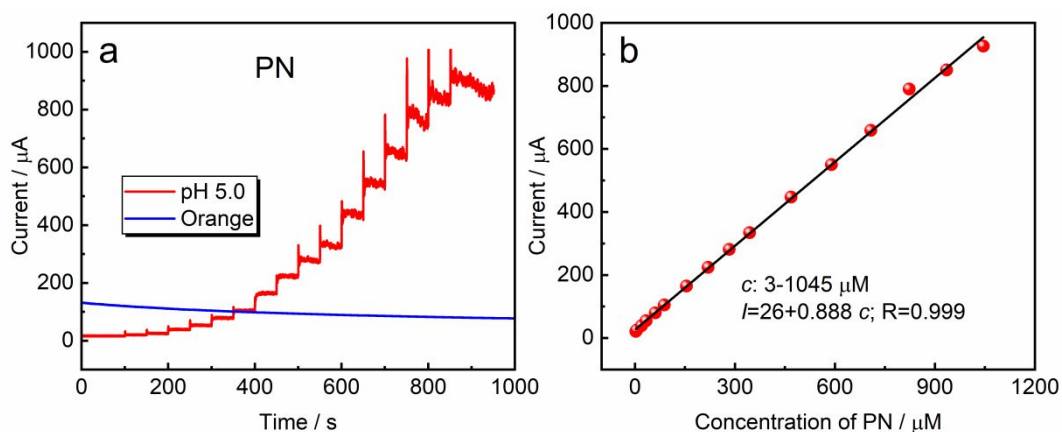

**Figure S17.** (a) Chronoamperometry traces for PN using the CuO-PLL/Gr electrode at 1 V. (b) The working curve. Electrolyte: pH 5.0 PBS solution.

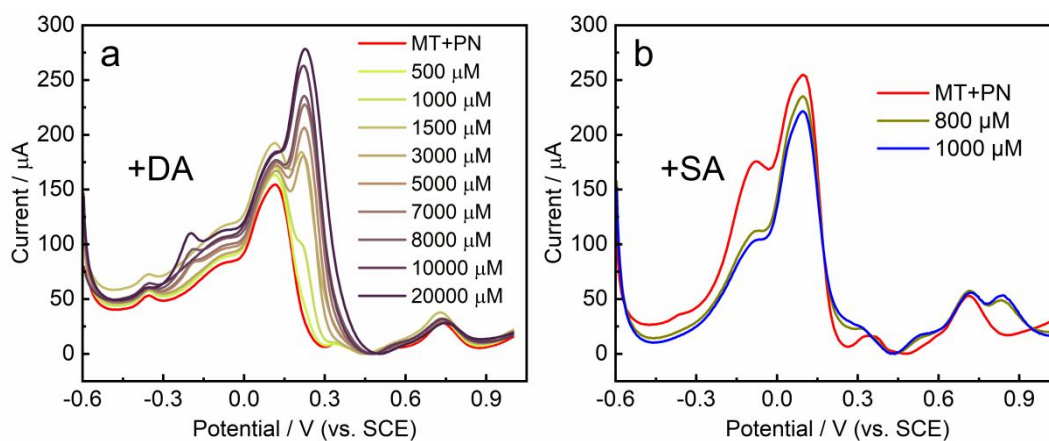

**Figure S18.** DPV curves for the CuO-PLL/Gr electrode in 0.1 M PBS (pH 6.0) containing 300  $\mu\text{M}$  MT, 800  $\mu\text{M}$  PN, and additional (a) 500–20000  $\mu\text{M}$  dopamine or (b) 800–1000  $\mu\text{M}$  salicylic acid.

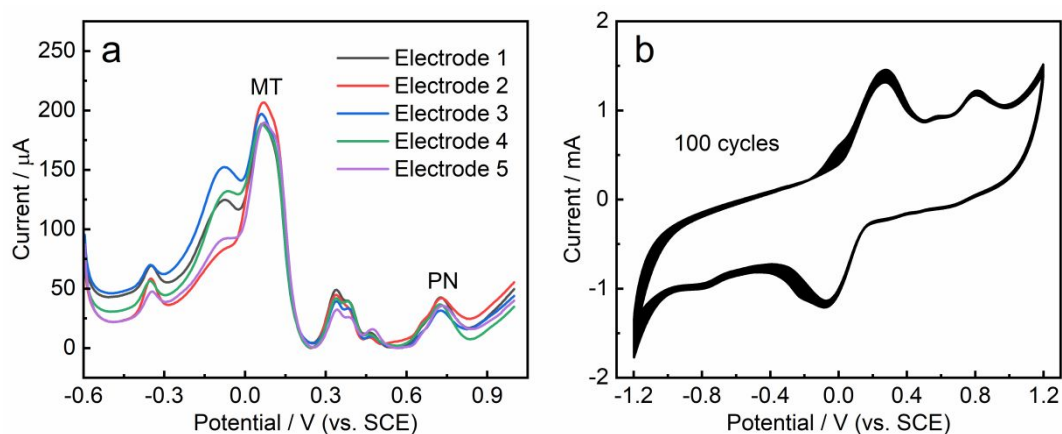

**Figure S19.** (a) DPV traces separately acquired using five different CuO-PLL/Gr electrodes. (b) CV traces continuously recorded for 100 cycles using a CuO-PLL/Gr electrode. Electrolyte: a solution of 300  $\mu\text{M}$  MT and 800  $\mu\text{M}$  PN.

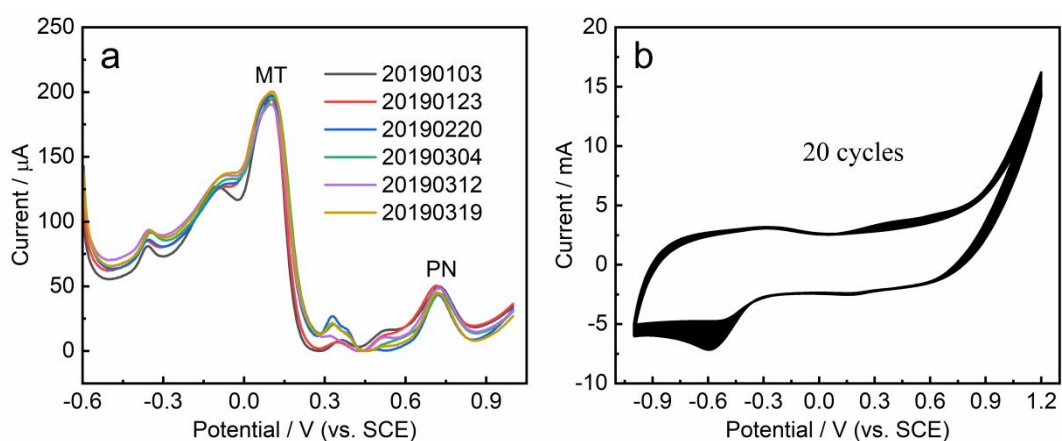

**Figure S20.** (a) DPV traces for the CuO-PLL/Gr electrode acquired over several months. Electrolyte: a solution of 300  $\mu\text{M}$  MT and 800  $\mu\text{M}$  PN. (b) CV curves acquired during catalyst regeneration. Electrolyte: 0.1 M NaOH.

**Table S1.** Comparing different methods for the detection of MT and PN.

| Method     | Real sample                         | Sample preparation method                               | Concentration range/ $\mu$ M |            | LOD/ $\mu$ M |      | Ref.         |
|------------|-------------------------------------|---------------------------------------------------------|------------------------------|------------|--------------|------|--------------|
|            |                                     |                                                         | MT                           | PN         | MT           | PN   |              |
| EC         | Orange                              | Crush or insert directly                                | 0.016-1110                   | 3-2076     | 0.012        | 2.3  | This work    |
| HPLC-FD    | Rice                                | Pressurized Liquid Extraction                           | 0.75-15; 15-750              | -          | 1.15         | -    | <sup>1</sup> |
| EC         | Lymph node                          | Slices                                                  | 0.05-100                     | -          | 0.024        | -    | <sup>2</sup> |
| EC         | Oxylife capsules; Melatonex tablets | Liquid extraction                                       | 4.3-430                      | 49-850     | 0.6          | 6.6  | <sup>3</sup> |
| BIA-MPA    | Pharmaceutical sample               | Oral solution was dissolved in ethanol-buffer solution. | -                            | 10-30      | -            | 0.54 | <sup>4</sup> |
| UV spectra | Laboratory prepared mixtures        | -                                                       | -                            | 24.3-243.1 | -            | 4.9  | <sup>5</sup> |
| EC         | Human serum; tablet                 | diluted by pH 3 B-R buffer solution                     | 0.02-6                       | -          | 4.1          | -    | <sup>6</sup> |

**Table S2.** Detecting MT in orange puree samples (n=5).

| MT in the orange<br>puree/ $\mu\text{M}$ | Added/ $\mu\text{M}$ | Found / $\mu\text{M}$ | RSD/% | Recovery/% |
|------------------------------------------|----------------------|-----------------------|-------|------------|
| 86.9 $\pm$ 0.5                           | 48                   | 134.1                 | 4.3   | 98.3       |
|                                          | 91                   | 187.3                 | 3.7   | 100.1      |
|                                          | 130                  | 225.8                 | 4.1   | 99.7       |
|                                          | 170                  | 261.9                 | 2.8   | 97.4       |
|                                          | 200                  | 294.8                 | 3.9   | 99.3       |
|                                          | 231                  | 326.9                 | 4.2   | 99.9       |

**Table S3.** Detecting PN in orange puree samples (n=5).

| PN in the orange<br>puree/ $\mu\text{M}$ | Added/ $\mu\text{M}$ | Found / $\mu\text{M}$ | RSD/% | Recovery/% |
|------------------------------------------|----------------------|-----------------------|-------|------------|
| 83.6 $\pm$ 0.5                           | 48                   | 132.3                 | 3.1   | 101.6      |
|                                          | 89                   | 173.2                 | 3.7   | 100.7      |
|                                          | 168                  | 253.2                 | 4.8   | 101.0      |
|                                          | 200                  | 283.2                 | 1.9   | 99.8       |
|                                          | 265                  | 352.8                 | 2.7   | 101.6      |

## ■ REFERENCES

- (1) Setyaningsih, W.; Saputro, I. E.; Barbero, G. F.; Palma, M.; García Barroso, C., Determination of Melatonin in Rice (*Oryza sativa*) Grains by Pressurized Liquid Extraction. *J. Agric. Food Chem.* **2015**, *63* (4), 1107-1115.
- (2) Hensley, A. L.; Colley, A. R.; Ross, A. E., Real-Time Detection of Melatonin Using Fast-Scan Cyclic Voltammetry. *Anal. Chem.* **2018**, *90* (14), 8642-8650.
- (3) Alpar, N.; Pinar, P. T.; Yardim, Y.; Senturk, Z., Voltammetric Method for the Simultaneous Determination of Melatonin and Pyridoxine in Dietary Supplements Using a Cathodically Pretreated Boron-doped Diamond Electrode. *Electroanalysis* **2017**, *29* (7), 1691-1699.
- (4) Freitas, J. M.; Oliveira, T. d. C.; Gimenes, D. T.; Munoz, R. A. A.; Richter, E. M., Simultaneous Determination of Three Species with a Single-Injection Step Using Batch Injection Analysis with Multiple Pulse Amperometric Detection. *Talanta* **2016**, *146*, 670-675.
- (5) Ibrahim, M. M.; Elzanfaly, E. S.; El-Zeiny, M. B.; Ramadan, N. K.; Kelani, K. M., Spectrophotometric Determination of Meclizine Hydrochloride and Pyridoxine Hydrochloride in Laboratory Prepared Mixtures and in Their Pharmaceutical Preparation. *Spectrochim. Acta, Part A* **2017**, *178*, 234-238.
- (6) Zeinali, H.; Bagheri, H.; Monsef-Khoshhesab, Z.; Khoshsavar, H.; Hajian, A., Nanomolar Simultaneous Determination of Tryptophan and Melatonin by a New Ionic Liquid Carbon Paste Electrode Modified with SnO<sub>2</sub>-Co<sub>3</sub>O<sub>4</sub>@rGO Nanocomposite. *Mater. Sci. Eng. C* **2017**, *71*, 386-394.
